# Supplementary material for: Grafting-enhanced tolerance of cucumber to toxic stress is associated with regulation of phenolic and other aromatic acids metabolism
Source: PeerJ journal article supplement (doi:10.7717/peerj.13521), 2022-06-01
Supplement: Supplemental_file-New.zip [file Supplemental_file-New.zip]

## Sheet: Root exudate
Standard Curve	content (μg/mL)
gallic acid	y=71023x-894.98
p-Hydroxybenzonic	y=16967x+541.31
caffeic acid	y=4000000x-75903
sinapic acid	y=39714x+1670.3
p-Coumaric acid	y=227280x-1899.3
benzoic acid	y=2081.1x-162.64
1cinnamic acid	y=45621x-458.83
2cinnamic acid	y=64718x-70161
Ferulic acid	y=8568.3x+440.82
	gallic acid		p-Hydroxybenzonic		caffeic acid		sinapic acid	芥子酸	p-Coumaric acid	对香豆酸	benzoic acid	苯甲酸	cinnamic acid	肉桂酸cinnamic acid
Treatment	Peak area	Content(mg/L)	Peak area	Content(mg/L)	Peak area	Content(mg/L)	Peak area	Content(mg/L)	Peak area	Content(mg/L)	Peak area	Content(mg/L)	Peak area	Content(mg/L)
RG-CK1											5670	0.280267	655743	1.43838
RG-CA			17954	0.102627	10021	0.0021481	6063	0.0110608	328425	0.145338	26121	1.26297	54646595	84.5464
NG-CK	16314	0.0242302									6457	0.318084	206922	0.454573
NG-CA	7982	0.0124987	14539	0.0824995					16906	0.00827407	8312	0.407219	31861948	49.3404

## Sheet: Leaf and Root
Leaf
gallic acid				p-Hydroxybenzonic				caffeic acid				sinapic acid				p-Coumaric acid				benzoic acid				cinnamic acid				ferulic acid
Treatment	Peak area	Content(mg/L)		Treatment	Peak area	Content(mg/L)		Treatment	Peak area	Content(mg/L)		Treatment	Peak area	Content(mg/L)		Treatment	Peak area	Content(mg/L)		Treatment	Peak area	Content(mg/L)		Treatment	Peak area	Content(mg/L)		Treatment	Peak area	Content(mg/L)
RG-CK1	5328	0.0876192		RG-CK1	6780	0.367696		RG-CK1	8207	0.0210275		RG-CK1				RG-CK1	5050	0.0305759		RG-CK1	13348	6.49207		RG-CK1	7656	0.177875		RG-CK1	445204	51.908
RG-CK2	3242	0.0582485		RG-CK2	5568	0.296263		RG-CK2	8847	0.0211875		RG-CK2				RG-CK2	6456	0.0367621		RG-CK2	13918	6.76596		RG-CK2	5413	0.128709		RG-CK2	412388	48.0781
RG-CK3	4288	0.0729761		RG-CK3	5605	0.298443		RG-CK3	8268	0.0210427		RG-CK3				RG-CK3	5819	0.0339594		RG-CK3	13387	6.51081		RG-CK3	6426	0.150914		RG-CK3	445593	51.9534
RG-CA1	2446	0.0470408		RG-CA1	63941	3.73665		RG-CA1	17675	0.0233945		RG-CA1				RG-CA1	7390	0.0408716		RG-CA1	19016	9.21563		RG-CA1	16970	0.382035		RG-CA1	520214	60.6623
RG-CA2	3558	0.0626977		RG-CA2	66565	3.8913		RG-CA2	4779	0.0201705		RG-CA2				RG-CA2	5945	0.0345138		RG-CA2	21506	10.4121		RG-CA2	15460	0.348936		RG-CA2	469637	54.7595
RG-CA3	3827	0.0664852		RG-CA3	52140	3.04112		RG-CA3	3875	0.0199445		RG-CA3	14386	0.320182		RG-CA3	5728	0.033559		RG-CA3	19389	9.39486		RG-CA3	15701	0.354219		RG-CA3	403972	47.0958
NG-CK1	13930	0.208735		NG-CK1	9194	0.509972		NG-CK1		0.0189757		NG-CK1	4434	0.0695901		NG-CK1	10019	0.0524388		NG-CK1	10392	5.07166		NG-CK1	5407	0.128577		NG-CK1	164141	19.1053
NG-CK2	16191	0.24057		NG-CK2	9457	0.525472		NG-CK2		0.0189757		NG-CK2		-0.0420582		NG-CK2	11186	0.0575735		NG-CK2	9047	4.42537		NG-CK2	4509	0.108893		NG-CK2	178179	20.7437
NG-CK3	15681	0.233389		NG-CK3	9850	0.548635		NG-CK3		0.0189757		NG-CK3		-0.0420582		NG-CK3	10419	0.0541988		NG-CK3	6386	3.14672		NG-CK3	3032	0.0765181		NG-CK3	182825	21.2859
NG-CA1	14405	0.215423		NG-CA1	10924	0.611934		NG-CA1	8112	0.0210038		NG-CA1		-0.0420582		NG-CA1	5206	0.0312623		NG-CA1	10026	4.8958		NG-CA1	4224	0.102646		NG-CA1	229435	26.7257
NG-CA2	15168	0.226166		NG-CA2	9882	0.550521		NG-CA2	2066	0.0194922		NG-CA2		-0.0420582		NG-CA2	6974	0.0390413		NG-CA2	9813	4.79345		NG-CA2	4297	0.104247		NG-CA2	155650	18.1143
NG-CA3	17209	0.254903		NG-CA3	10072	0.561719		NG-CA3		0.0189757		NG-CA3		-0.0420582		NG-CA3	7060	0.0394197		NG-CA3	6911	3.39899		NG-CA3	5249	0.125114		NG-CA3	202807	23.618
Root
RG-CK1	7936	0.12434		RG-CK1	1043	0.0295686		RG-CK1	446	0.0190873		RG-CK1	7446	0.145432		RG-CK1	7414	0.0409772		RG-CK1		0.078151		RG-CK1	2330	0.0611304		RG-CK1
RG-CK2	8299	0.129451		RG-CK2	1310	0.045305		RG-CK2	13480	0.0223458		RG-CK2	5857	0.105421		RG-CK2	7014	0.0392173		RG-CK2		0.078151		RG-CK2	3261	0.0815377		RG-CK2
RG-CK3	8919	0.13818		RG-CK3	1322	0.0460123		RG-CK3		0.0189757		RG-CK3	6962	0.133245		RG-CK3	5270	0.0315439		RG-CK3	10416	5.0832		RG-CK3	3373	0.0839927		RG-CK3
RG-CA1	5402	0.0886611		RG-CA1	1226	0.0403542		RG-CA1	555	0.0191145		RG-CA1	6687	0.126321		RG-CA1	6539	0.0371273		RG-CA1		0.078151		RG-CA1	149453	3.28603		RG-CA1
RG-CA2	5821	0.0945606		RG-CA2	1321	0.0459533		RG-CA2		0.0189757		RG-CA2	6970	0.133447		RG-CA2	7071	0.0394681		RG-CA2		0.078151		RG-CA2	126839	2.79033		RG-CA2
RG-CA3	4978	0.0826912		RG-CA3	1156	0.0362286		RG-CA3		0.0189757		RG-CA3	7312	0.142058		RG-CA3	5635	0.0331499		RG-CA3		0.078151		RG-CA3	129909	2.85763		RG-CA3
NG-CK1	3284	0.0588398		NG-CK1	1983	0.0849702		NG-CK1		0.0189757		NG-CK1	6976	0.133598		NG-CK1	3568	0.0240554		NG-CK1		0.078151		NG-CK1	8173	0.189207		NG-CK1	1781	0.156411
NG-CK2	4616	0.0775943		NG-CK2	2033	0.0879171		NG-CK2		0.0189757		NG-CK2	6108	0.111741		NG-CK2	4110	0.0264401		NG-CK2		0.078151		NG-CK2	8705	0.200869		NG-CK2	1472	0.120348
NG-CK3	3437	0.060994		NG-CK3	1641	0.0648135		NG-CK3	702	0.0191513		NG-CK3	5922	0.107058		NG-CK3	3319	0.0229598		NG-CK3		0.078151		NG-CK3	9126	0.210097		NG-CK3	1632	0.139022
NG-CA1	3942	0.0681044		NG-CA1	2063	0.0896853		NG-CA1		0.0189757		NG-CA1	4790	0.0785542		NG-CA1	5921	0.0344082		NG-CA1		0.078151		NG-CA1	9616	0.220838		NG-CA1	2681	0.26145
NG-CA2	2713	0.0508002		NG-CA2	2103	0.0920428		NG-CA2		0.0189757		NG-CA2	4383	0.0683059		NG-CA2	5600	0.0329959		NG-CA2		0.078151		NG-CA2	10360	0.237146		NG-CA2	1179	0.0861524
NG-CA3	3250	0.0583611		NG-CA3	2526	0.116974		NG-CA3		0.0189757		NG-CA3	4346	0.0673742		NG-CA3	5556	0.0328023		NG-CA3		0.078151		NG-CA3	8910	0.205362		NG-CA3	1833	0.16248
Leaf	gallic acid				p-Hydroxybenzonic				p-Coumaric acid				sinapic acid				benzoic acid				caffeic acid				ferulic acid				cinnamic acid
	NG-CK	NG-CA	RG-CK	RG-CA	NG-CK	NG-CA	RG-CK	RG-CA	NG-CK	NG-CA	RG-CK	RG-CA	NG-CK	NG-CA	RG-CK	RG-CA	NG-CK	NG-CA	RG-CK	RG-CA	NG-CK	NG-CA	RG-CK	RG-CA	NG-CK	NG-CA	RG-CK	RG-CA	NG-CK	NG-CA	RG-CK	RG-CA
	0.208735	0.215423	0.0876192	0.0470408	0.509972	0.611934	0.367696	3.73665	0.0524388	0.0312623	0.0305759	0.0408716					5.07166	4.8958	6.49207	9.21563					19.1053	26.7257	51.908	60.6623	0.177875	0.102646	0.128577	0.212245
	0.24057	0.226166	0.0582485	0.0626977	0.525472	0.550521	0.296263	3.8913	0.0575735	0.0390413	0.0367621	0.0345138					4.42537	4.79345	6.76596	10.4121					20.7437	18.1143	48.0781	54.7595	0.128709	0.104247	0.108893	0.191925
	0.233389	0.254903	0.0729761	0.0664852	0.548635	0.561719	0.298443	3.04112	0.0541988	0.0394197	0.0339594	0.033559					3.14672	3.39899	6.51081	9.39486					21.2859	23.618	51.9534	47.0958	0.150914	0.125114	0.0765181	0.190873
AG	0.227564	0.232164	0.0729479	0.0587413	0.528026	0.574725	0.320801	3.55636	0.054737	0.0365744	0.0337658	0.0363148					4.21459	4.36274	6.58961	9.6742					20.3783	22.8194	50.6465	54.1726	0.152499	0.110669	0.104663	0.198348
SE	0.0166975	0.0204121	0.0146854	0.0103083	0.0194578	0.0327072	0.0406269	0.452858	0.00260929	0.0046043	0.00309764	0.00397506					0.97963	0.836202	0.15301	0.645303					1.13529	4.36089	2.22443	6.80228	0.0246213	0.0125354	0.0262863	0.0120467
	a	a	a	a	a	a	b	a	a	b	a	a					a	a	b	a					a	a	a	a
Final AG	9.10258	9.28656	2.91792	2.34965	21.1211	22.989	12.832	142.254	2.18948	1.46298	1.35063	1.45259					168.583	174.51	263.584	386.968					815.133	912.775	2025.86	2166.9	6.09997	4.42676	4.18652	7.93392
Final SE	0.667899	0.816484	0.587416	0.412333	0.778311	1.30829	1.62507	18.1143	0.104372	0.184172	0.123906	0.159003					39.1852	33.4481	6.1204	25.8121					45.4115	174.436	88.9773	272.091	0.984852	0.501415	1.05145	0.48187
Root																									a	a	a	a	a	b	b	a
	NG-CK	NG-CA	RG-CK	RG-CA	NG-CK	NG-CA	RG-CK	RG-CA	NG-CK	NG-CA	RG-CK	RG-CA	NG-CK	NG-CA	RG-CK	RG-CA	NG-CK	NG-CA	RG-CK	RG-CA	NG-CK	NG-CA	RG-CK	RG-CA	NG-CK	NG-CA	RG-CK	RG-CA	NG-CK	NG-CA	RG-CK	RG-CA
	0.0588398	0.0681044	0.12434	0.0886611	0.0849702	0.0896853	0.0295686	0.0403542	0.0344082	0.0240554	0.0371273	0.0409772	0.133598	0.0785542	0.145432	0.126321									0.156411	0.26145			0.189207	0.220838	0.0611304	3.28603
	0.0775943	0.0508002	0.129451	0.0945606	0.0879171	0.0920428	0.045305	0.0459533	0.0329959	0.0264401	0.0394681	0.0392173	0.111741	0.0683059	0.105421	0.133447									0.120348	0.0861524			0.200869	0.237146	0.0815377	2.79033
	0.060994	0.0583611	0.13818	0.0826912	0.0648135	0.116974	0.0460123	0.0362286	0.0328023	0.0229598	0.0331499	0.0315439	0.107058	0.0673742	0.133245	0.142058									0.139022	0.16248			0.210097	0.205362	0.0839927	2.85763
AG	0.0658094	0.0590886	0.130657	0.0886377	0.0792336	0.0995672	0.0402953	0.0408454	0.0334021	0.0244851	0.0365817	0.0372461	0.117466	0.0714114	0.128033	0.133942									0.138594	0.170028			0.200058	0.221115	0.0755536	2.978
SE	0.0102627	0.00867503	0.00699869	0.00593473	0.0125748	0.0151203	0.00929633	0.00488095	0.000876669	0.00177949	0.00319424	0.00501606	0.0141656	0.00620331	0.0205085	0.00788044									0.0180354	0.087892			0.0104683	0.0158936	0.012551	0.268876
	a	a	a	b	a	a	a	a	a	b	a	a	a	b	a	a									b	a			a	a	b	a
Final AG	2.63238	2.36354	5.22628	3.54551	3.16934	3.98269	1.61181	1.63381	1.33608	0.979403	1.46327	1.48985	4.69863	2.85646	5.12132	5.35767									5.54375	6.8011			8.00231	8.84461	3.02214	119.12
Final SE	0.410509	0.347001	0.279947	0.237389	0.502994	0.604814	0.371853	0.195238	0.0350668	0.0711797	0.127769	0.200642	0.566625	0.248132	0.820339	0.315218									0.721416	3.51568			0.418734	0.635745	0.50204	10.755
sample weight(g)	0.5
extracting solution Volume(ml)	20
